# Supplementary material for: A Level 3 Monthly Gridded Ice Cloud Dataset Derived from a Decade of CALIOP Measurements
Source: Copernicus journal article supplement (doi:10.5194/essd-2023-373), 2023-11-20
Supplement: Supplementary file [file essd-2023-373-AC2-supplement.pdf]

**Anonymous Referee #2, 09 Jan 2024**

*The authors make a laudable contribution to global ice cloud measurements through a useful and well-documented data product with valuable comparisons to peer data products. Especially useful for users are formulae and examples of how to process the product's vertically-resolved histograms into more commonly used quantities. Below, I highlight several points where further clarification could be useful.*

The authors thank the reviewer for the great appraisal and encouragement. The paper is intended to provide an overview of the CALIPSO Level 3 ice cloud product, including the algorithm, core content, demonstration of usage and comparison with other similar products. We also appreciate the constructive feedbacks from the reviewer. The comments are addressed in detail below.

**Minor comments:**

1. *Lines 221-223: The authors write "Comparison of panels (e) and (f) shows the most significant impact of applying quality filters is the exclusion of bins deep within opaque cloud layers where the overlying optical depth exceeds 2, such as near latitudes 19.0° N and 11.0° N." This sentence is confusing since it refers to overall product behavior anecdotally via the example of a single granule -- the "exclusion of bins deep within opaque layers" is a general statement about the product while "near latitudes 19°N and 11°N" is a particular statement about the example.*

To avoid confusion, this sentence is revised as "Comparison of panels (e) and (f) shows the most significant impact of applying quality filters is the exclusion of bins deep within opaque cloud layers where the overlying optical depth exceeds 2, as demonstrated near latitudes 19.0° N and 11.0° N in this case study."

2. *Lines 263-265: The authors write "In L2-CPro, the AVD is reported at 60 m vertical resolution between 8.2 km and 20.2 km but reported at 30 m vertical resolution below 8.2 km, while the vertical resolution of L3-Ice is 60 m at all altitudes." However, the reported resolution of L3-Ice is 120 m as documented elsewhere in the text. Perhaps the authors could clarify how this 60 m resolution appears to be an intermediate aggregating resolution rather than a final output resolution.*

In the first draft, the authors provided a brief explanation at Line 267: "When aggregating two 60-m bins to one L3 120-m vertical bin, each 60-m cloudy bin is considered as one sample count." In the revised version, the authors further provided an analogy with aggregation method of passive sensors to help clarify: "When aggregating two 60-m bins to one L3 120-m vertical bin, each 60-m cloudy bin is considered as one sample count thus the sample count in this L3 120-m bin would be two. This aggregation method from fine vertical bin to coarse vertical bin

*is analogous to accumulating level 2 passive sensor data with a spatial scale of tens of kilometers, for example, into a level 3 coarse horizontal grid such as 1.0° longitude by 1.0° latitude.”*

- 3. Figures 7 & 8: I am curious about the small but noticeable elevated IWC and extinction at 4 km visible at most latitudes, appearing as a horizontal band, which is also noticeable in the percent of ice samples rejected. It looks as if it might be an effect of either the CPro retrieval or QC filtering, but I did not see it discussed in the text.*

The elevated IWC and extinction coefficient around 4 km is an artificial discontinuity introduced by the single shot clearing algorithm, which deserves a detailed analysis in a future study. However as ice clouds are mainly formed above 4 km, the impact of this artificial discontinuity on the IWC and ice cloud extinction coefficients is probably small.

Still users should be aware of this potential impact. In the revised version, a new paragraph is added at the end of Section 4.2. It is also included here.

*“It is noticed that a discontinuity appears around 4 km in mean zonal IWC and extinction coefficient patterns in Figure 7 and the percentage of removed ice cloud samples in Figure 8. This discontinuity is likely due to the boundary layer cloud-clearing process in the Level 2 feature detection algorithm. More details on the boundary layer cloud-clearing process are provided in Section 5.3. ”*

- 4. Line 403-407: I found the impact of cloud-clearing on scattering/extinction fields somewhat vague. Are the authors stating that, for intermittently cloudy layers at 5 km resolution with <4 km top height, the resulting cloudy extinction/IWC used by L3-ICE ignores scattering from single-shot-detectable clouds?*

Yes, that is correct. Due to an oversight in the design of the Level 2 algorithms, the cloud extinction coefficients and IWC of clouds detected in single shots is ignored in constructing the Level 2 CPro product. This then propagates into L3-ICE. The impact of this clearing of clouds detected in single shots is difficult to quantify, however, due to the varied impacts of removing strongly scattering clouds from the 5-km averages. An investigation showed that IWC in L3-ICE could be either increased or decreased by cloud clearing, depending on the details of the circumstances. In this section we are only trying to point out the existence of this source of uncertainty and where, geographically, it is a concern.

- 5. Section 6: In the comparison between L3-ICE and the combined radar-lidar products, many differences are stated to be "significant," but I do not see any statistical significance testing in this section.*

The sample size of the data used to produce these plots is large, so even small differences would be statistically significant. But the word “significant” is used here in the sense of an observed difference which is clearly noticeable to the eye.

- 6. Radar-lidar vs. lidar-only comparison: The authors provide an invaluable comparison to similar products but provide relatively little discussion of large differences in ice cloud frequency in the region where one would expect the greatest agreement (>15 km/lidar-only). One product agrees well with L3-ICE, while another (DARDAR) shows far fewer ice clouds (Fig. 20a). Do the authors expect L3-ICE ice cloud occurrence to be more accurate for high clouds than the combined products, or do the authors think definitional differences could explain such a large discrepancy?*

The cloud mask algorithms associated with L3-ICE, DARDAR, and 2C-ICE are quite different. Each of these algorithms involve several adjustable parameters. Parameter values are typically chosen to optimize the ability of the algorithm to address a particular set of objectives. How these parameters are “tuned” to meet the objectives will have an effect on the frequency of the reported cloud occurrence. The 2C-ICE cloud mask algorithm, which operates quite differently from the CALIOP algorithm, seems to have been tuned to agree with the CALIOP cloud mask. DARDAR was developed for application to EarthCARE joint radar-lidar observations (Ceccaldi et al. 2013), using CALIPSO-CloudSat to develop a prototype algorithm. EarthCARE has a requirement to provide information on cloud occurrence and composition at a 1-km horizontal scale. Because of this the DARDAR algorithm does not do the extensive averaging used by the CALIOP algorithm and so has less sensitivity to the optically thin cirrus which is prevalent in the tropical upper troposphere. Analysis of CALIOP cloud data shows the difference between CALIOP and DARDAR near 15 km in Figure 20 (a) is, qualitatively, what one would expect from limited sensitivity to thin cirrus.

*Text/figure corrections:*

The authors thank the reviewer taking extra efforts to improve the paper. The suggested corrections have been implemented in the revised version.

- 7. Figure 5: caption reads "Level 3Tropospheric" (missing a space)*

Missing space is now added between “Level 3” and “Tropospheric”.

- 8. Figure 7: units of IWC and ice extinction are not specified in either the figure or the caption.*

Units of IWC ( $\text{g m}^{-3}$ ) and ice extinction ( $\text{km}^{-1}$ ) have been added in the caption.

9. *Figure 11: Meaning of grey pixels in both panels is not stated.*

Grey pixels represent averaged surface and subsurface at each latitude detected either from CALIOP lidar or DEM if signals are totally attenuated. The explanation now is added in the caption of Figure 11:

“ Mean surface and the subsurface below determined from lidar detection, or from the DEM if the signal has been fully attenuated, are shaded in gray; ...”

10. *Lines 287-298: "all-sky IWC (Figure 7 (h) and (j) shows a rainbow-shaped maximum" -- missing ")"*

The missing “)” is now added in the revision.

11. *Line 386: "when averaged using a 10°×10° (red))" -- extra ")"*

The extra “)” has been removed in the revision.

12. *Line 408: "impacts L2 CPro ice cloud extinction" -- elsewhere it's spelled as "L2-CPro"*

The “L2 CPro” is replaced by “L2-CPro” to ensure the consistency of the paper.

13. *Line 504: "L3-ICE reports very little IWC greater than 0.1 gm<sup>-3</sup> while DARDAR and 2C-ICE report a significant number of larger values contribute to an IWC which is 3 to 5 times higher than from L3-ICE." -- grammatically confusing*

The sentence is replaced by “L3-ICE reports very few occurrences of IWC greater than 0.1 gm<sup>-3</sup> while DARDAR and 2C-ICE identify a significant number of IWC occurrences above this threshold, which results in a much smaller average IWC than that from the DARDAR or 2C-ICE histograms.”

14. *Line 562: the CloudSat data center is at CIRA (CSU/NOAA), not CIRES (CU Boulder/NOAA)*

The CloudSat data center is now corrected.
